# Supplementary material
Source: publisher figshare collection journal article supplement (https://acs.figshare.com/ndownloader/files/4646944)
Supplement: Supplementary file 1 [file 4646944]

## **Supporting information**

### **Directed Synthesis of Hierarchical Nano-Structured TiO<sub>2</sub> Catalysts and their Morphology-Dependent Photocatalysis for Phenol Degradation**

Lu Liu\*, Huajie Liu, Ya-Ping Zhao\*, Yuqiu Wang, Yueqin Duan, Guandao Gao,  
Ming Ge, Wei Chen\*

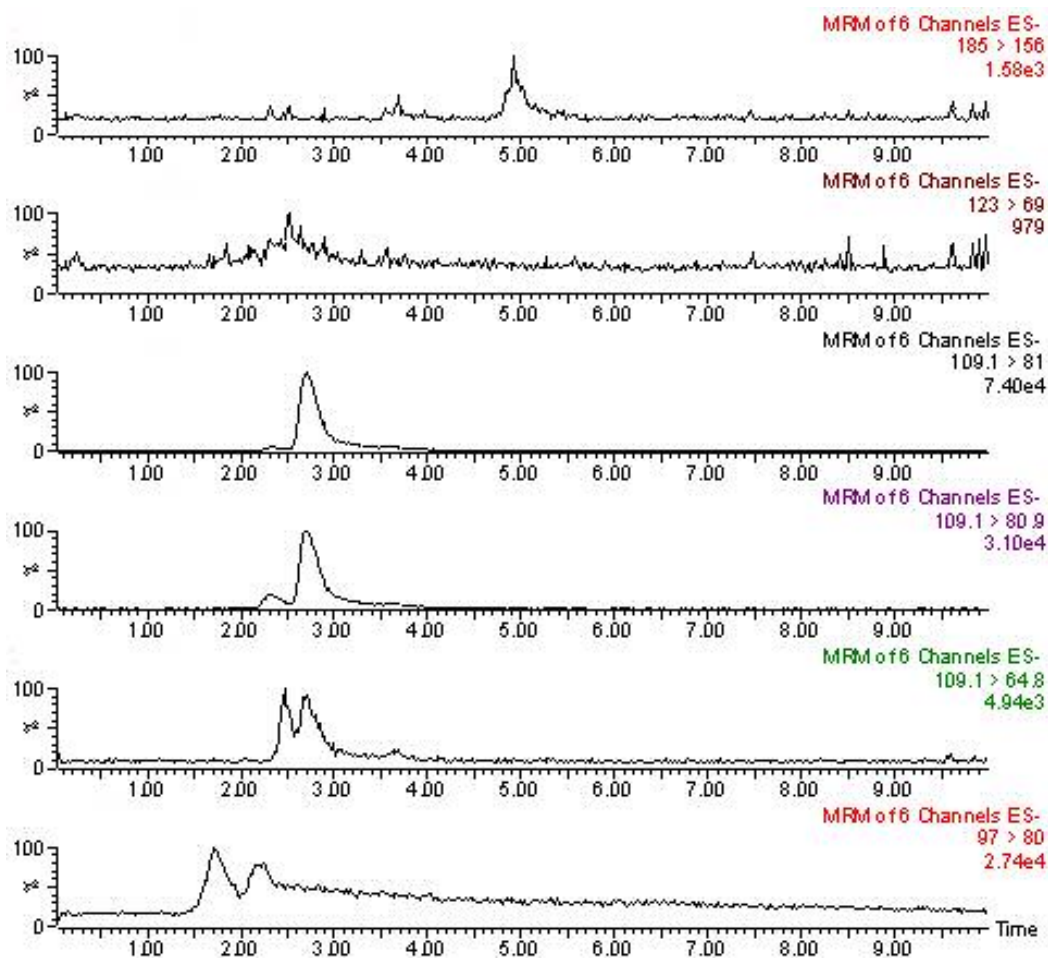

**Figure. I.a.** Samples  $\text{TiO}_2$  3D<sub>1D</sub> microspheres for HPLC/MS/MS analysis were taken at 180min, MRM chromatogram of intermediates of phenol degradation: RT1.72min-maleic anhydride, RT2.53min-benzoquinone, RT4.93min-4,4'-dihydroxybiphenyl, RT2.30min-p-dihydroxybenzene, RT2.49-m-dihydroxybenzene, RT2.70-o-dihydroxybenzene.

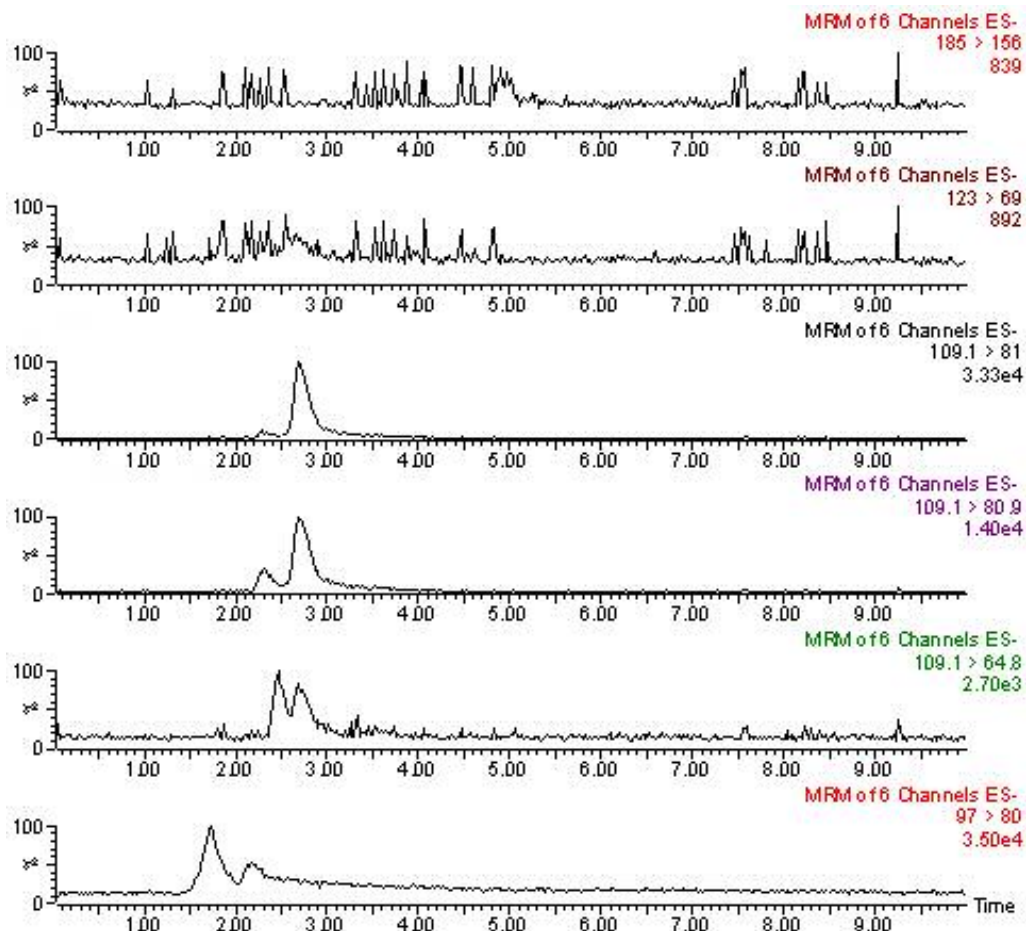

**Figure. I.b.** Samples TiO<sub>2</sub> 1D nanorods for HPLC/MS/MS analysis were taken at 180min, MRM chromatogram of intermediates of phenol degradation: RT1.72min-maleic anhydride, RT2.53min-benzoquinone, RT4.93min-4,4'-dihydroxybiphenyl, RT2.30min-p-dihydroxybenzene, RT2.49m-dihydroxybenzene, RT2.70-o-dihydroxybenzene.

**Annotation I:** Intermediates of phenol was identified in the negative ion mode in the m/z 40-200 for HPLC/LC/MS/MS(Quattro Micro™ Api, Waters, USA) equipped with an electrospray ionization source (ESI). HPLC series (waters 2695, USA) is equipped with a reversed-phase C18 column (Xterra, USA) of 150×2.1mm and 5μm particle diameter. Column temperature was maintained at 25°C. The mobile phase used for eluting phenol from the HPLC columns consisted of acetonitrile and water (40:60v/v) at a flow-rate of 0.2 mL/min.

Negative ions were acquired in multiple reaction monitoring (MRM) mode with a dwell time of 200 ms. For the negative model, the temperature of the heated capillary and source were 350 °C and 90°C, respectively. The source voltage was set

to 4.0 kV. Analysis of the intermediates of phenol was performed using LC-ESI-MS/MS with multiple reaction monitoring (MRM). The optimal conditions for MS/MS analysis of the compounds and the precursor, [M-H]<sup>-</sup>, and product ions monitored in MRM mode are summarized in Table.I.

Table.I. Optimal ESI-MS/MS Conditions for Analysis of intermediates of phenol

| analyte                | Precursor ion, [M-H] <sup>-</sup> (m/z) | Product ion (m/z) | Cone voltage (V) | Collision energy (eV) |
|------------------------|-----------------------------------------|-------------------|------------------|-----------------------|
| 4,4'-dihydroxybiphenyl | 185                                     | 156               | 30               | 33                    |
| benzoquinone           | 123                                     | 39                | 30               | 28                    |
| p-dihydroxybenzene     | 109                                     | 81                | 30               | 16                    |
| m-dihydroxybenzene     | 109                                     | 65                | 30               | 12                    |
| o- dihydroxybenzene    | 109                                     | 81                | 30               | 12                    |
| maleic anhydride       | 97                                      | 80                | 30               | 17                    |

The result of intermediates of phenol degradation obtained at Figure.I.a and Figure. I.b.

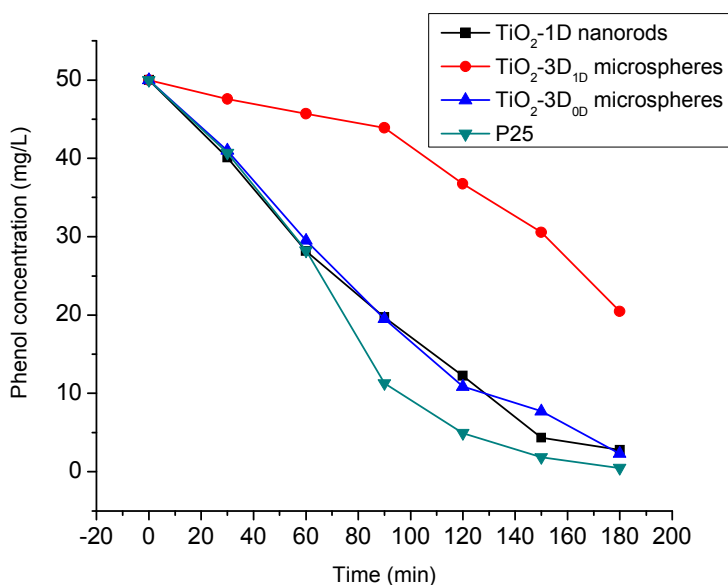

**Figure.II.** Phenol concentration decreased as irradiation time, using TiO<sub>2</sub> 3D<sub>0D</sub> microspheres, TiO<sub>2</sub> 1D nanorods, TiO<sub>2</sub> 3D<sub>1D</sub> microspheres, and Degussa P25.

**Annotation II:**

Experimental results obtained in the present study showed that when Degussa P25 was used as the photocatalyst, white emulsion was formed in solution after treatment for 180 minutes; this emulsion makes it difficult to separate the photocatalyst, a difficult issue that has to be handled in treatment processes. The synthetic TiO<sub>2</sub> 3D<sub>0D</sub> microspheres, however, can precipitate from wastewater much more easily after treatment because the diameters of these microspheres are approximately 5000-10000 times as large as those of Degussa P25 (with diameters from 21 to 24 nm). Therefore, the synthetic TiO<sub>2</sub> 3D<sub>0D</sub> microspheres are much easier to separate than the Degussa P25 nanoparticles. This is a significant advantage of the synthetic TiO<sub>2</sub> 3D<sub>0D</sub> microspheres over Degussa P25.
